# Supplementary material
Source: Springer Nature journal article supplement (https://www.springermedizin.de/resource/supplementary/13229_2013_121_MOESM2_ESM.pdf/9676226)
Supplement: MOESM2 [file 9676226]

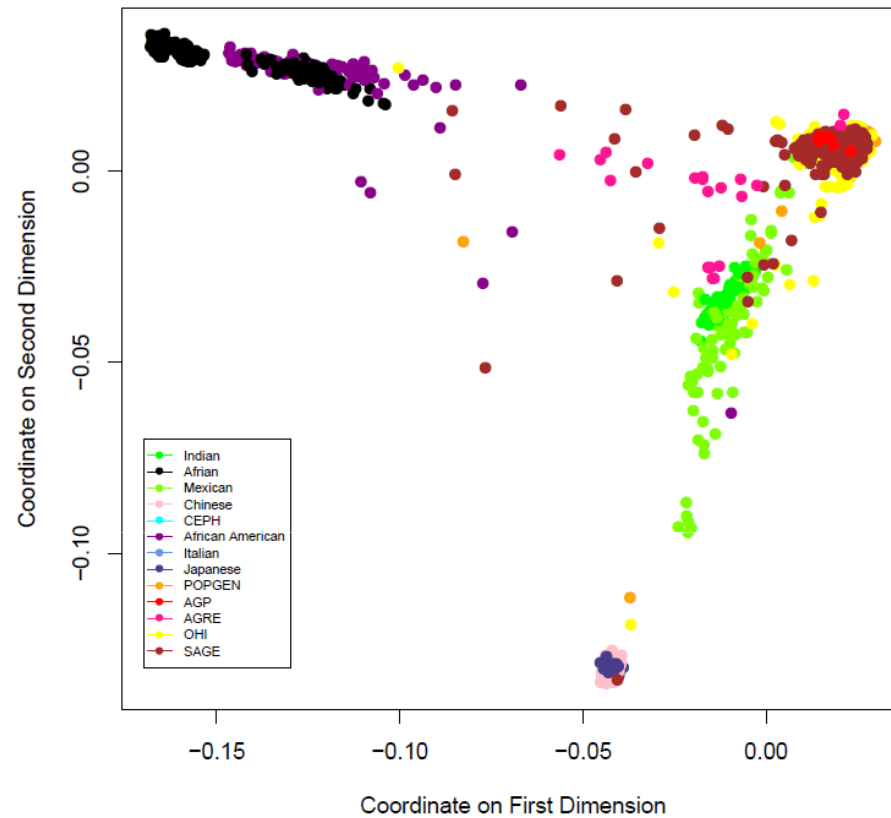

**Additional File 2.** Multidimensional Scaling (MDS) analysis results, using 1397 unrelated HapMap3 samples as reference set to infer ethnicities, control samples from SAGE consortium, Ottawa (OHI) and Northern Germany (PopGen), and the ASD cases and relatives with the *ANXA1* duplication (AGP and AGRE).
